# Supplementary material for: Performance of cytokine models in predicting SLE activity
Source: PubMed Central journal article supplement (PMC6915901; doi:10.1186/s13075-019-2029-1), 2019-12-16
Supplement: 13075_2019_2029_MOESM6_ESM.pdf [file 13075_2019_2029_MOESM6_ESM.pdf]

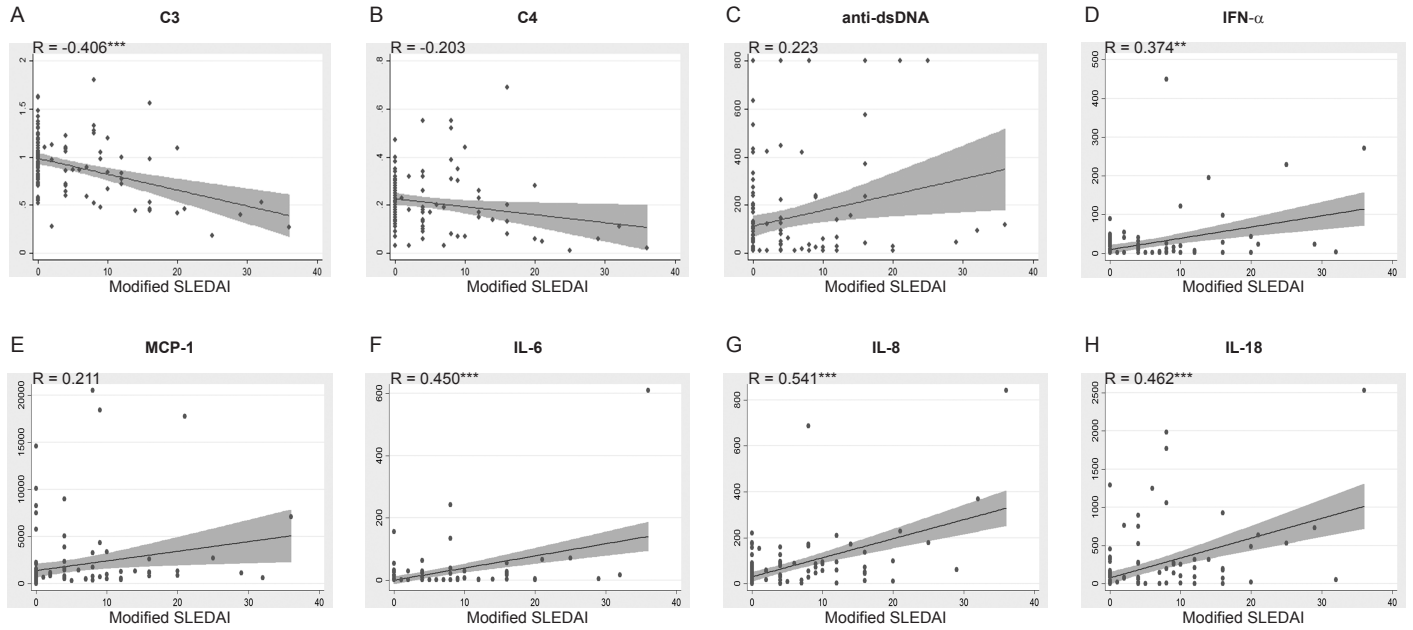

**Fig. S1 Correlation of biomarkers and modified SLEDAI in SLE patients (N=124).**

Pearson correlation coefficient (R) of C3 (A), C4 (B), anti-dsDNA (C), IFN- $\alpha$  (D), MCP-1 (E), IL-6 (F), IL-8 (G), and IL-18 (H) and modified SLEDAI scores were showed. The grey area is 95% confidence interval;  $p < 0.05$ ,  $**p < 0.01$ , and  $***p < 0.001$  (Bonferroni correction).
