# Supplementary material for: Performance of cytokine models in predicting SLE activity
Source: PubMed Central journal article supplement (PMC6915901; doi:10.1186/s13075-019-2029-1), 2019-12-16
Supplement: 13075_2019_2029_MOESM7_ESM.pdf [file 13075_2019_2029_MOESM7_ESM.pdf]

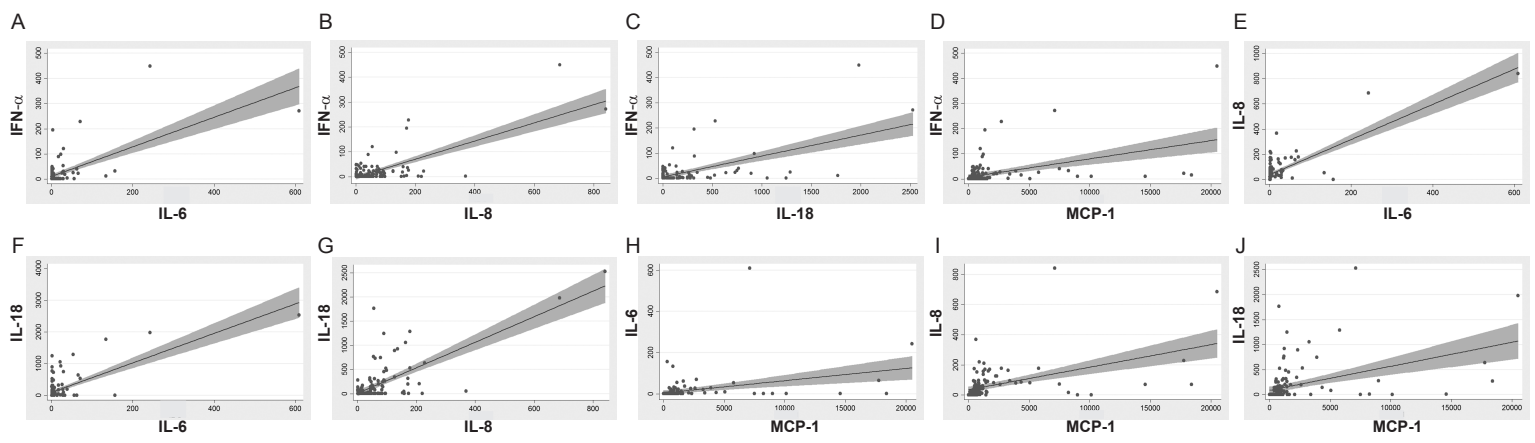

**Fig. S2 The correlation between each cytokine in all SLE patients (N=124)**  
 The correlation coefficient were shown in Table 3.
